# Supplementary material for: Functional Associations by Response Overlap (FARO), a Functional Genomics Approach Matching Gene Expression Phenotypes
Source: PLoS One. 2007 Aug 1;2(8):e676. doi: 10.1371/journal.pone.0000676 (PMC1924877; doi:10.1371/journal.pone.0000676)
Supplement: Table S1 — (0.13 MB XLS) [file pone.0000676.s004.xls]

## Sheet: Factors
NASCArray Ref#	Experiment	Factor	Replicates in experimental design	Type of analysis	Notes
	Hormone Treatments
172	ACC time course in wildtype seedlings	ACC	3	ANOVA; Time course	Wildtype seedlings were treated with ACC for 30 min, 1 hr and 3 hr
173	Zeatin time course in wildtype seedlings	zeatin	2	ANOVA; Time course	Wildtype seedlings were treated with zeatin for 30 min, 1 hr and 3 hr
174	Methyl Jasmonate time course in wildtype	methyl jasmonate	2	ANOVA; Time course	Wildtype seedlings were treated with methyl jasmonate for 30 min, 1 hr and 3 hr
175	IAA time course in wildtype seedlings	IAA	2	ANOVA; Time course	Wildtype seedlings were treated with IAA for 30 min, 1 hr and 3 hr
176	ABA time course in wildtype seedlings	ABA (seedlings)	2	ANOVA; Time course	Wildtype seedlings were treated with ABA for 30 min, 1 hr and 3 hr
177	GA3 time course in wildtype and ga1-5 mutant seedlings	GA3	2	ANOVA; Time course	Wildtype and ga1 mutant seedlings were treated with GA3 for 30 min, 1 hr and 3 hr
		GA3 treatment: ga1 (interaction)	2	ANOVA; Time course	"-"
		ga1 (NASCArray181)	2	ANOVA; Time course
178	Brassinolide time course in wildtype and det2-1 mutant seedlings	brassinolide (NASCArray 178)	2	ANOVA; Time course	Wildtype and det2 mutant seedlings were treated with brassinolide for 30 min, 1 hr and 3 hr
		brassinolide treatment of det2	2	ANOVA; Time course	"-"
		det2 (NASCArray180)	2	ANOVA; Time course	"-"
179	Effect of brassinosteroids in seedlings	6-deoxocastasterone	2	t-test	det2 mutant seedlings were treated with several brassinosteroid compounds
		castasterone	2	t-test	"-"
		brassinolide (NASCArray 179)	2	t-test	"-"
		campestanol	2	t-test	"-"
		6-deoxocathasterone	2	t-test	"-"
		cathasterone	2	t-test	"-"
		6-deoxoteasterone	2	t-test	"-"
		teasterone	2	t-test	"-"
		3-dehydro-6-deoxoteasterone	2	t-test	"-"
		3-dehydroteasterone	2	t-test	"-"
		6-deoxotyphasterol	2	t-test	"-"
		typhasterol	2	t-test	"-"
180	Comparison of plant hormone-related mutants	det2 (NASCArray178)	3	t-test	Comparison of plant hormone related mutants
		ga1 (NASCArray177)	3	t-test	"-"
181	Cytokinin treatment of seedlings	t-zeatin	3	ANOVA	Wildtype and ARR22 overexpressing seedlings were treated with tzeatin for 3 hours
		ARR22 overexpressor	3	ANOVA	"-"
		t-zeatin:ARR22oxmutant (interaction)	3	ANOVA	"-"
182	ARR21C overexpression	ARR21C overespressor	3	t-test	Wildtype and ARR21C overexpressing seedlings were compared
183	Effect of ABA during seed imbibition	ABA (during seed imbibition)	2	ANOVA	experiment studies the effect of two concentrations of ABA during seed imbibition in the wt ecotype
184	Basic hormone treatment of seeds	gibberellin	2	ANOVA; Time course	hormone treatment of seeds
185	Effect of gibberellic acid inhibitors on seedlings	paclobutrazol	2	ANOVA; Time course	Wildtype seedlings were treated with inhibitors of gibberellic acid biosynthesis
		prohexadione	2	ANOVA; Time course	"-"
		propiconazole	2	ANOVA; Time course	"-"
		uniconazole	2	ANOVA; Time course	"-"
186	Effect of auxin inhibitors on seedlings	2,4,6-trihydroxybenzamide	2	t-test	Wildtype seedlings were treated with auxin inhibitors
		PCIB	2	t-test	"-"
		TIBA	2	t-test	"-"
		NPA (inhibitor of auxin transport)	2	t-test	"-"
187	Effect of brassinosteroid inhibitors on seedlings	brassinazole91	2	t-test	Wildtype seedlings were treated with brassinazoles
		brassinazole220	2	t-test	"-"
188	Effect of ethylene inhibitors on seedlings	AgNO3	2	t-test	Wildtype seedlings were treated with ethylene inhibitors
		AVG	2	t-test	"-"
189	Effect of cycloheximide on seedlings	cycloheximide	2	t-test	Wildtype seedlings were treated with cycloheximide
190	Effect of proteasome inhibitor MG13 on seedlings	MG13	2	t-test	Wildtype seedlings were treated with the proteasome inhibitor MG13 (carbobenzoxylleucinylleucinylleucinal) for 3 hours
191	Effect of photosynthesis inhibitor PNO8 on seedlings	PNO8	2	ANOVA; Time course	Wildtype seedlings were treated with the photosynthesis inhibitor PNO8 (Noctyl3nitro2,4,6trihydroxybenzamide)
192	Effect of ibuprofen, salicylic acid and daminozide on seedlings	ibuprofen	2	t-test	seedlings were treated with ibuprofen, salicylic acid or daminozide
		B9 (daminozide)	2	t-test	"-"
		salicylic acid	2	t-test	"-"
	Pathogen Infection
120	Response to virulent, avirulent, typeIII-secretion system deficient and nonhost bacteria	P. syringae DC3000 (NASCArray 120)	3	ANOVA; Time course	Infection with Pseudomonas syringae pv tomato DC3000, avrRpm1, DC3000 hrcC- or phaseolicola
		P. syringae avrRpm1	3	ANOVA; Time course	"-"
		P. syringae DC3000 hrcC-	3	ANOVA; Time course	"-"
		P. syringae phaseolicola	3	ANOVA; Time course	"-"
122	Response to bacterial-(LPS, HrpZ, Flg22) and oomycete-(NPP1) derived elicitors	GST	2	ANOVA; Time course	Base line experiment for pathogen infection
		HrpZ	2	ANOVA; Time course	"-"
		Flg-22	2	ANOVA; Time course	"-"
		LPS	2	ANOVA; Time course	"-"
		GST-NPP1	2	ANOVA; Time course	"-"
123	Response to Phytophthora infestans	P. infestans	3	ANOVA; Time course	Infection with Phytophthora infestans
167	Response to Botrytis cinerea infection	B. cinerea	3	ANOVA; Time course	Infection with Botrytis cinerea conidiospores
168	Pseudomonas half leaf injection	P. syringae (virulent)	2	ANOVA; Time course	Half of a Columbia plant leaf was injected with Pseudomonas syringae. The other half of the leaf was collected on a time course for analysis
		P. syringae (avirulent)	2	ANOVA; Time course	"-"
169	Response to Erysiphe orontii infection	E. orontii	3	ANOVA; Time course	Responses to E. orontii infection were assayed in wild-type Col-0 plants at 6, 12, 18, 24, 48, 72, 96, and 120 hours after inoculation of adult leaves. Inoculation was done via settling tower, using 10 day old E. orontii cultures. Leaves number 7 to 10 were selected for profiling.
	Growth Condition Treatments
124	Light Treatments	red light for 1 min (sampled 45 min after)	3	t-test	Seedlings exposed to the light conditions for 1 h (to identify early induced genes) and 4 hrs (maximum expression of the first initial light response of most target genes), respectively.
		UVA/B light for 5 min (sampled 4 hours after)	3	t-test	"-"
		UVA light for 5 min (sampled 4 hours after)	3	t-test	"-"
		blue light for 45min	3	t-test	"-"
		far-red light for 45min	3	t-test	"-"
		red light for 45min	3	t-test	"-"
		white light for 45min	3	t-test	"-"
		red light for 1 min (sampled 4 hours after)	3	t-test	"-"
		UVA/B light for 5 min (sampled 45 min after)	3	t-test	"-"
		UVA light for 5 min (sampled 45 min after)	3	t-test	"-"
		blue light for 4hours	3	t-test	"-"
		far-red light for 4hours	3	t-test	"-"
		red light for 4hours	3	t-test	"-"
		white light for 4hours	3	t-test	"-"
170	Different temperature treatment of seeds	seeds at 4C vs. 22C (vernalization)	2	t-test	Wildtype seeds were treated at 22 C and 4 C
171	Response to sulfate limitation	sulfate	2	ANOVA; Time course	experiment studies the effect of sulfate limitation in the roots of 10dayold Arabidopsis seedlings from Columbia0 ecotype
	Stress Series (NASCarray 137 used as control/reference)
137	Controls		2	ANOVA; tissue factor and time course	control experiments for stress treatment, control samples include 0h; roots and shoots were prepared separately
138	Cold stress	Cold stress	2	ANOVA; tissue factor and time course	Stress Treatments (Cold stress)
		Cold stress (tissue specific)	2	ANOVA; tissue factor and time course	"-"
139	Osmotic stress	Osmotic stress	2	ANOVA; tissue factor and time course	Stress Treatments (Osmotic stress)
		Osmotic stress (tissue specific)	2	ANOVA; tissue factor and time course	"-"
140	Salt stress	Salt stress	2	ANOVA; tissue factor and time course	Stress Treatments (Salt stress)
		Salt stress (tissue specific)	2	ANOVA; tissue factor and time course	"-"
141	Drought stress	Drought stress	2	ANOVA; tissue factor and time course	Stress Treatments (Drought stress)
		Drought stress (tissue specific)	2	ANOVA; tissue factor and time course	"-"
142	Genotoxic stress	Genotoxic stress	2	ANOVA; tissue factor and time course	Stress Treatments (Genotoxic stress)
		Genotoxic stress (tissue specific)	2	ANOVA; tissue factor and time course	"-"
143	Oxidative stress	Oxidative stress	2	ANOVA; tissue factor and time course	Stress Treatments (Oxidative stress)
		Oxidative stress (tissue specific)	2	ANOVA; tissue factor and time course	"-"
144	UV-B stress	UV-B stress	2	ANOVA; tissue factor and time course	Stress Treatments (UV-B stress)
		UV-B stress (tissue specific)	2	ANOVA; tissue factor and time course	"-"
145	Wounding stress	Wounding stress	2	ANOVA; tissue factor and time course	Stress Treatments (Wounding stress)
		Wound stress (tissue specific)	2	ANOVA; tissue factor and time course	"-"
146	Heat stress	Heat stress	2	ANOVA; tissue factor and time course	Stress Treatments (Heat stress)
		Heat stress (tissue specific)	2	ANOVA; tissue factor and time course	"-"
		Heat stress, recovery from	2	ANOVA; tissue factor and time course	"-"
		Heat stress, recovery from (tissue specific)	2	ANOVA; tissue factor and time course	"-"
	Developmental Series
149	Seedlings and Whole Plants	seedling, green part (day 7)	3	t-test (equal variance; using the remaining "Developmental Series" [149-154] as controls)	Developmental series (seedlings and whole plants)
		seedling post transition prior to bolting (day 21)	3	t-test (equal variance; using the remaining "Developmental Series" [149-154] as controls)	"-"
		seedling post transition prior to bolting (day 22)	3	t-test (equal variance; using the remaining "Developmental Series" [149-154] as controls)	"-"
		seedling post transition prior to bolting (day 23)	3	t-test (equal variance; using the remaining "Developmental Series" [149-154] as controls)	"-"
150	Leaves	cotyledons (day 7)	3	t-test (equal variance; using the remaining "Developmental Series" [149-154] as controls)	Developmental series (leaves)
		leaf (1 & 2; day 7)	3	t-test (equal variance; using the remaining "Developmental Series" [149-154] as controls)	"-"
		rosette leaf (nr 2 day 17)	3	t-test (equal variance; using the remaining "Developmental Series" [149-154] as controls)	"-"
		rosette leaf (nr 4 day 17)	3	t-test (equal variance; using the remaining "Developmental Series" [149-154] as controls)	"-"
		rosette leaf (nr 6; day 17)	3	t-test (equal variance; using the remaining "Developmental Series" [149-154] as controls)	"-"
		rosette leaf (nr 8; day 17)	3	t-test (equal variance; using the remaining "Developmental Series" [149-154] as controls)	"-"
		rosette leaf (nr 10; day 17)	3	t-test (equal variance; using the remaining "Developmental Series" [149-154] as controls)	"-"
		rosette leaf (nr 12; day 17)	3	t-test (equal variance; using the remaining "Developmental Series" [149-154] as controls)	"-"
		petiol (leaf nr 7; day 17)	3	t-test (equal variance; using the remaining "Developmental Series" [149-154] as controls)	"-"
		leaf proximal half (nr 7; day 17)	3	t-test (equal variance; using the remaining "Developmental Series" [149-154] as controls)	"-"
		leaf distal half (nr 7; day 17)	3	t-test (equal variance; using the remaining "Developmental Series" [149-154] as controls)	"-"
		senescing leaves (day 35)	3	t-test (equal variance; using the remaining "Developmental Series" [149-154] as controls)	"-"
		caulin leaves (day 21)	3	t-test (equal variance; using the remaining "Developmental Series" [149-154] as controls)	"-"
		vegetative rosette (short days; day 7)	3	t-test (equal variance; using the remaining "Developmental Series" [149-154] as controls)	"-"
		vegetative rosette (short days; day 14)	3	t-test (equal variance; using the remaining "Developmental Series" [149-154] as controls)	"-"
		vegetative rosette (short days; day 21)	3	t-test (equal variance; using the remaining "Developmental Series" [149-154] as controls)	"-"
		leaf (day 15)	3	t-test (equal variance; using the remaining "Developmental Series" [149-154] as controls)
		glossy1	3	t-test (equal variance; using the remaining "Developmental Series" [149-154] as controls)	"-"
151	Roots	roots (day 7)	3	t-test (equal variance; using the remaining "Developmental Series" [149-154] as controls)	Developmental series (roots)
		roots (day 17)	3	t-test (equal variance; using the remaining "Developmental Series" [149-154] as controls)	"-"
152	Flowers and Pollen	flower (stage 9)	3	t-test (equal variance; using the remaining "Developmental Series" [149-154] as controls)	Developmental series (flowers and pollen)
		flower (stage 10/11)	3	t-test (equal variance; using the remaining "Developmental Series" [149-154] as controls)	"-"
		flower (stage 12)	3	t-test (equal variance; using the remaining "Developmental Series" [149-154] as controls)	"-"
		sepals (stage 12)	3	t-test (equal variance; using the remaining "Developmental Series" [149-154] as controls)	"-"
		petals (stage 12)	3	t-test (equal variance; using the remaining "Developmental Series" [149-154] as controls)	"-"
		stamen (stage 12)	3	t-test (equal variance; using the remaining "Developmental Series" [149-154] as controls)	"-"
		carpels (stage 12)	3	t-test (equal variance; using the remaining "Developmental Series" [149-154] as controls)	"-"
		flower (stage 15)	3	t-test (equal variance; using the remaining "Developmental Series" [149-154] as controls)	"-"
		pedicels (stage 15)	3	t-test (equal variance; using the remaining "Developmental Series" [149-154] as controls)	"-"
		sepals (stage 15)	3	t-test (equal variance; using the remaining "Developmental Series" [149-154] as controls)	"-"
		petals (stage 15)	3	t-test (equal variance; using the remaining "Developmental Series" [149-154] as controls)	"-"
		stamen (stage 15)	3	t-test (equal variance; using the remaining "Developmental Series" [149-154] as controls)	"-"
		carpels (stage 15)	3	t-test (equal variance; using the remaining "Developmental Series" [149-154] as controls)	"-"
		pollen	3	t-test (equal variance; using the remaining "Developmental Series" [149-154] as controls)	"-"
		lfy12 (NASCArray 152)	3	t-test (equal variance; using the remaining "Developmental Series" [149-154] as controls)	"-"
		clv3.7	3	t-test (equal variance; using the remaining "Developmental Series" [149-154] as controls)	"-"
		ap1.15	3	t-test (equal variance; using the remaining "Developmental Series" [149-154] as controls)	"-"
		ap2.6	3	t-test (equal variance; using the remaining "Developmental Series" [149-154] as controls)	"-"
		ap3.6	3	t-test (equal variance; using the remaining "Developmental Series" [149-154] as controls)	"-"
		ag-12	3	t-test (equal variance; using the remaining "Developmental Series" [149-154] as controls)	"-"
		ufo1	2	t-test (equal variance; using the remaining "Developmental Series" [149-154] as controls)	"-"
153	Shoots and Stems	hypocotyl	3	t-test (equal variance; using the remaining "Developmental Series" [149-154] as controls)	Developmental series (shoots and stems)
		shoot apex, vegetative leaves	3	t-test (equal variance; using the remaining "Developmental Series" [149-154] as controls)	"-"
		shoot apex vegetative	3	t-test (equal variance; using the remaining "Developmental Series" [149-154] as controls)	"-"
		shoot apex tranition (before bolting)	3	t-test (equal variance; using the remaining "Developmental Series" [149-154] as controls)	"-"
		stem 2nd internode	3	t-test (equal variance; using the remaining "Developmental Series" [149-154] as controls)	"-"
		stem 1st node	3	t-test (equal variance; using the remaining "Developmental Series" [149-154] as controls)	"-"
		shoot apex, inflorescence (after bolting)	3	t-test (equal variance; using the remaining "Developmental Series" [149-154] as controls)	"-"
154	Siliques and Seeds	siliques (stage 3)	3	t-test (equal variance; using the remaining "Developmental Series" [149-154] as controls)	Developmental series (siliques and seeds)
		siliques (stage 4)	3	t-test (equal variance; using the remaining "Developmental Series" [149-154] as controls)	"-"
		siliques (stage 5)	3	t-test (equal variance; using the remaining "Developmental Series" [149-154] as controls)	"-"
		seeds (stage 6)	3	t-test (equal variance; using the remaining "Developmental Series" [149-154] as controls)	"-"
		seeds (stage 7)	3	t-test (equal variance; using the remaining "Developmental Series" [149-154] as controls)	"-"
		seeds (stage 8)	3	t-test (equal variance; using the remaining "Developmental Series" [149-154] as controls)	"-"
		seeds (stage 9)	3	t-test (equal variance; using the remaining "Developmental Series" [149-154] as controls)	"-"
		seeds (stage 10)	3	t-test (equal variance; using the remaining "Developmental Series" [149-154] as controls)	"-"
155	Mutants and Other Ecotypes	apical region rosett stage	4 (2x Ler, 2x Col)	t-test (equal variance; using the remaining "Developmental Series" [149-154] as controls)	Developmental series (mutants and other ecotypes)
		lfy12 (NASCArray 155)	2	ANOVA; Time course
		lfy12:long day (interaction)	2	ANOVA; Time course
		co.CS175	2	ANOVA; Time course
		co.CS175:long day (interaction)	2	ANOVA; Time course
		ft.CS184	2	ANOVA; Time course
		ft.CS184:long day (interaction)	2	ANOVA; Time course
	Miscelaneous
10	Identification of global gene expression in cir1 and cir1:ein2 plants	cir1	1	ANOVA	The aim of the proposed experiment is to identify EIN2 dependent and independent global gene expression in cir1 plants
		ein2 (NASCArray 10)		ANOVA
24	Cold induced changes in gene expression: differences between the Arabidopsis thaliana wild type and freezing sensitive mutants. Bramke	sfr2-1	2	t-test	Irene Bramke, Investigation of how the sfr2 and sfr6 mutants respond to low temperature on the gene expression level.
		sfr6-1	2	t-test	"-"
32	Ethylene induced hyponastic growth in Arabidopsis thaliana	hyponastic growth induction (petriole, 10% of normal light )	3	t-test	3 hours in 10% of normal light
		hyponastic growth induction (petriole + ethylene)	3	t-test	3 hours in 5 ppm ethylene
52	The effects of mutants in stress response pathways on gene expression during senescence	coi1	2	t-test	Dr Vicky Buchanan-Wollaston
		ein2 (NASCArray 52)	2	t-test	"-"
		NahG	2	t-test	"-"
70	The effects of the sfr2, sfr3 and sfr6 mutations on lyotropic stress responses (Cold)	sfr2	2	ANOVA	Dr Gareth Warren
		sfr2.Cold	2	ANOVA	"-"
		sfr3	2	ANOVA	"-"
		sfr3.Cold	2	ANOVA	"-"
		sfr6	2	ANOVA	"-"
		sfr6 cold	2	ANOVA	"-"
	The effects of the sfr6 mutation on lyotropic stress responses (Drought)	sfr6 drought	2	ANOVA	"-"
77	Identification of Core Genes Regulating Plant Programmed Cell Death (PCD)	PCD (fumonisin treatment)	4	t-test	PCD-inducing treatment, involving a mycotoxin, Fumonisin B1 (FB1). This is an extremely potent compound that induces PCD by disrupting ceramide synthesis.
81	Gibberellin and ethylene cross-talk at the level of transcriptional regulation in Arabidopsis	etr1	3	ANOVA	Liesbeth De Grauwe, investigate whether plants with decreased ethylene perception are generally hypersensitive to GA or whether this effect is restricted to specific genes
		GA4	3	ANOVA	"-"
		GA4 treatment of etr1 mutant	3	ANOVA	"-"
108	Circadian expression of genes: modelling the Arabidopsis circadian clock	Circadian clock	1	Fourier	Dr Kieron Edwards
132	Effect of CaM overexpression on Arabidopsis transcriptome	Calmoduline overexpressor	1	ANOVA	Mr Richard Capper
		Calmoduline oex. isoform diff	1	ANOVA	"-"
133	cold treatment	Cold treatment	1	ANOVA	Dr Nicola Evans
		Altered lipid saturation (fad3/fad7/fad8 triple mutant)	1	ANOVA
		Cold +alt. lipid saturation (fad3/fad7/fad8 triple mutant)	1	ANOVA
330	Transcriptome changes of Arabidopsis during pathogen and insect attack Pieterse	P. syringae DC3000 avirulent	1	ANOVA; Time course	Prof. Corne Pieterse
		F. occidentalis	1	ANOVA; Time course	"-"
		M. persicae	1	ANOVA; Time course	"-"
		P. rapae	1	ANOVA; Time course	"-"
324	Low chronic exposure of Arabidopsis thaliana to Caesium-137	Caesium137	3	t-test	Yu-Jin Heinekamp
53/328	calcicole/calcifuge	calcicole vs. calcifuge	2	t-test	Dr Bev Abram
		high/low Ca2+	2	ANOVA
		echotype:high/low Ca2+	2	ANOVA
334	Identifying targets of FLC at 27C	fri:flc Circadian rythm	2		Dr Kieron Edwards
335	Over-expression of MBF1c enhances stress tolerance	MBF1c overexpressor	3	t-test	Dr Ron Mittler
337	Arabidopsis E2F target genes (E2F:Dra double overexpressor)	E2Fa:Dpa overexpression	4	t-test	Dr. Lieven De Veylder
338	Hydrogen peroxide stress and Zat12 over-expression in Arabidopsis	H2O2	3	ANOVA	Dr Ron Mittler
		Zat12 overexpressor	3	ANOVA	"-"
		Zat12 overespressor:H2O2 (interaction)	3	ANOVA	"-"
340	Genome-wide transcriptional analysis of the compatible Arabidopsis thaliana-Pseudomonas syringae pv. tomato DC3000 interaction	E. coli 0157	3	ANOVA; Time course	William Underwood
		E. coli TUV86	3	ANOVA; Time course	"-"
		P. syringae COR-	3	ANOVA; Time course	"-"
		P. syringae DC3000 (NASCArray 340)	2	ANOVA; Time course	"-"
		P. syringae COR-/hrpS	3	ANOVA; Time course	"-"
		P. syringae hrpA/fliC	3	ANOVA; Time course	"-"
		P. syringae hrpA	3	ANOVA; Time course	"-"
343	Global Transcript Profiling of the Green Sectors of the immutans Variegation mutant of Arabidopsis	immutans	3	t-test	Maneesha Aluru
349	Response to cold, plate/soil grown plants	Cold (soil & plate, 4C) treatment	2	ANOVA	Mr Jonathan Voge I
		Cold:Media (soil or plate, 4C)	2	ANOVA	"-"
351	Response to constitutive expression of the transcription factor CBF2	CBF2 overexpressor	2	t-test	Mr Jonathan Voge
353	Response to ZAT12 expression	Zat12 overexpressor	2	t-test	Mr Jonathan Voge IV
354	Response to potassium starvation in roots	K starvation, roots	1	t-test	Julian Schroeder
355	cpr5, npr1, scv1, and siv1 mutants	cpr5	2	ANOVA	Mr Jinyoung Yang
		npr1	2	ANOVA	"-"
		scv1	2	ANOVA	"-"
		svi1	2	ANOVA	"-"
		cpr5:npr1 (interaction)	2	ANOVA	"-"
356	FRI FLC combos	FRI	3	ANOVA	Dr Markus Schmid
		flc3	3	ANOVA	"-"
		FRI:flc3 (interaction)	3	ANOVA	"-"
357	Floral transition and early flower development	lfy	2	t-test	Director Detlef Weigel
		co-2	2	t-test	"-"
		ft-2	2	t-test	"-"
361	In vitro tracheary element transdifferentiation of Col-0 suspension cells, by 1 uM brassinolide and 10 mM H3BO3 treatment	Tracheary element transdifferentiation (suspension cells; brassinolide & H3BO3)	1	ANOVA; Time course	Hiroo Fukuda
367	A gene expression map of the Arabidopsis root endodermis	root: endodermis	3	t-test	Kenneth Birnbaum
		root: endodermis cortex	3	t-test	"-"
		root: epidermal atrichoblasts	3	t-test	"-"
		root: EZ3	4	t-test	"-"
		root: lateral root cap	3	t-test	"-"
		root: MZ3	4	t-test	"-"
		root: stele	3	t-test	"-"
		root: YDZ3	4	t-test	"-"
ArrayExpress	Our Data
E-MEXP-174	Arabidopsis ctr1 mutant	ctr1	3	ANOVA
E-MEXP-174	Arabidopsis mpk4 mutant	mpk4	3	ANOVA
E-MEXP-173	Arabidopsis mks1 overexpressor	mks1 overexpressor	3	ANOVA
NASCArray Ref#	cDNA studies		Number of genes matching Affymetrix GeneChip (ATH1)
197	Mutants response to IAA	IAAwt	11067	Treatment (in this case of wt seedlings)
227	ethylene treated leaves & seedlings	ethylene	2188	Treatment
250	White light time course	WhiteLightCol	11025	Treatment
		WhiteLightLer	11025	Treatment
266	Phytophthora Infestans inoculation	phytophthora	11067	Treatment
267	gibberellin	Gibberillin	11067	Treatment
271	Sulfur deficiency	Sulfur	11024	Treatment
288	cytokinin response genes	cytokinin	11441	Treatment
312	Salicylic acid dependent coupled regulation and cell death	Nah-G	11067	Treatment

## Sheet: mpk4 FARO
NASCArray or ArrayExpress ref#	Factor	FARO score -log10(p)	Overlap (genes)	Congruence (%)	Factor type
E-MEXP-174	mpk4 (query factor)	Inf	1209	100	Mutant/overexpressor/transgene
168	P. syringae (virulent)	287.888	455	100	Pathogen/elicitor
E-MEXP-173	mks1 overexpressor	284.224	452	100	Mutant/overexpressor/transgene
168	P. syringae (avirulent)	268.568	439	100	Pathogen/elicitor
123	P. infestans	233.82	409	99.022	Pathogen/elicitor
120	P. syringae phaseolicola	191.567	370	99.4595	Pathogen/elicitor
120	P. syringae DC3000 hrcC-	185.364	364	99.7253	Pathogen/elicitor
52	NahG	177.219	356	2.24719	Mutant/overexpressor/transgene
340	E. coli 0157	176.211	355	99.4366	Pathogen/elicitor
355	cpr5	173.201	352	99.4318	Mutant/overexpressor/transgene
138	Cold stress (tissue specific)	170.211	349	78.7966	Stress
140	Salt stress (tissue specific)	168.229	347	85.0144	Stress
120	P. syringae avrRpm1	166.256	345	99.7101	Pathogen/elicitor
340	E. coli TUV86	164.292	343	100	Pathogen/elicitor
142	Genotoxic stress (tissue specific)	158.455	337	66.4688	Stress
141	Drought stress (tissue specific)	156.528	335	70.1493	Stress
146	Heat stress, recovery from (tissue specific)	152.701	331	48.9426	Stress
146	Heat stress (tissue specific)	152.701	331	34.139	Stress
143	Oxidative stress (tissue specific)	150.801	329	63.5258	Stress
330	P. syringae DC3000 avirulent	147.97	326	99.6933	Pathogen/elicitor
145	Wound stress (tissue specific)	142.369	320	80.9375	Stress
150	rosette leaf (nr 10; day 17)	136.853	314	14.0127	Tissue/stage
340	P. syringae hrpA	134.126	311	99.6785	Pathogen/elicitor
139	Osmotic stress (tissue specific)	134.126	311	89.3891	Stress
169	E. orontii	128.738	305	93.4426	Pathogen/elicitor
150	rosette leaf (nr 8; day 17)	126.076	302	25.8278	Tissue/stage
122	GST	121.688	297	99.3266	Pathogen/elicitor
122	GST-NPP1	119.084	294	99.6599	Pathogen/elicitor
150	leaf (1 & 2; day 7)	116.503	291	2.4055	Tissue/stage
144	UV-B stress (tissue specific)	114.794	289	91.6955	Stress
122	HrpZ	111.405	285	98.5965	Pathogen/elicitor
149	seedling post transition prior to bolting (day 22)	108.89	282	16.3121	Tissue/stage
52	coi1	108.89	282	4.60993	Mutant/overexpressor/transgene
149	seedling post transition prior to bolting (day 21)	107.225	280	43.9286	Tissue/stage
122	Flg-22	106.397	279	98.9247	Pathogen/elicitor
122	LPS	105.571	278	84.1727	Pathogen/elicitor
150	rosette leaf (nr 12; day 17)	105.571	278	5.39568	Tissue/stage
167	B. cinerea	98.2499	269	97.026	Pathogen/elicitor
E-MEXP-174	ctr1	95.0622	265	83.3962	Mutant/overexpressor/transgene
340	P. syringae COR-	93.4837	263	99.6198	Pathogen/elicitor
120	P. syringae DC3000 (NASCArray 120)	91.9155	261	98.0843	Pathogen/elicitor
340	P. syringae DC3000 (NASCArray 340)	87.2733	255	97.2549	Pathogen/elicitor
150	senescing leaves (day 35)	80.4873	246	99.187	Tissue/stage
188	AgNO3	79.0085	244	96.7213	Hormone/hormone inhibitor
150	leaf proximal half (nr 7; day 17)	79.0085	244	25	Tissue/stage
182	ARR21C overespressor	76.8105	241	90.8714	Mutant/overexpressor/transgene
152	sepals (stage 15)	73.9177	237	98.7342	Tissue/stage
150	vegetative rosette (short days; day 7)	67.5693	228	4.38596	Tissue/stage
144	UV-B stress	64.82	224	97.3214	Stress
150	rosette leaf (nr 6; day 17)	64.82	224	53.125	Tissue/stage
340	P. syringae COR-/hrpS	63.4623	222	99.0991	Pathogen/elicitor
192	salicylic acid	61.447	219	95.8904	Hormone/hormone inhibitor
189	Cycloheximide	60.7809	218	92.6606	Compound
355	npr1	60.1177	217	38.7097	Mutant/overexpressor/transgene
53/328	calcicole vs. calcifuge	58.1455	214	19.1589	Compound
149	seedling post transition prior to bolting (day 23)	56.8451	212	42.4528	Tissue/stage
355	scv1	56.1993	211	97.6303	Mutant/overexpressor/transgene
124	red light for 1 min (sampled 4 hours after)	52.3862	205	11.2195	Light
152	pedicels (stage 15)	49.2904	200	14	Tissue/stage
343	immutans	49.2904	200	1.5	Mutant/overexpressor/transgene
191	PNO8	48.0732	198	96.4646	Compound
181	ARR22 overexpressor	48.0732	198	85.8586	Mutant/overexpressor/transgene
340	P. syringae hrpA/fliC	46.8682	196	98.4694	Pathogen/elicitor
150	rosette leaf (nr 4 day 17)	46.2703	195	71.2821	Tissue/stage
178	det2 (NASCArray180)	46.2703	195	8.71795	Mutant/overexpressor/transgene
150	leaf (day 15)	45.6755	194	2.57732	Tissue/stage
150	leaf distal half (nr 7; day 17)	43.9095	191	52.8796	Tissue/stage
330	F. occidentalis	41.5986	187	93.5829	Pathogen/elicitor
150	glossy1	41.5986	187	10.6952	Mutant/overexpressor/transgene
52	ein2 (NASCArray 52)	40.462	185	15.6757	Mutant/overexpressor/transgene
124	red light for 4hours	37.1291	179	21.7877	Light
150	cotyledons (day 7)	35.5064	176	36.3636	Tissue/stage
139	Osmotic stress	34.9721	175	97.1429	Stress
124	white light for 4hours	34.9721	175	20	Light
10	cir1	32.8679	171	94.152	Mutant/overexpressor/transgene
338	H2O2	31.3249	168	89.881	Compound
124	far-red light for 4hours	30.8174	167	23.3533	Light
152	lfy12 (NASCArray 152)	30.3132	166	53.6145	Mutant/overexpressor/transgene
10	ein2 (NASCArray 10)	29.3152	164	83.5366	Mutant/overexpressor/transgene
152	ufo1	29.3152	164	79.2683	Mutant/overexpressor/transgene
143	Oxidative stress	26.8809	159	74.2138	Stress
132	Calmoduline oex. isoform diff	26.8809	159	44.0252	Mutant/overexpressor/transgene
338	Zat12 overexpressor (NASCArray 338)	26.4045	158	87.3418	Mutant/overexpressor/transgene
349	Cold (soil & plate, 4C) treatment	26.4045	158	81.6456	Stress
145	Wounding stress	25.9317	157	94.9045	Stress
355	svi1	25.9317	157	28.0255	Mutant/overexpressor/transgene
124	UVA light for 5 min (sampled 4 hours after)	25.9317	157	18.4713	Light
357	co-2	24.9968	155	58.0645	Mutant/overexpressor/transgene
152	ap1.15	24.0762	153	89.5425	Mutant/overexpressor/transgene
181	t-zeatin	23.6213	152	75.6579	Hormone/hormone inhibitor
186	TIBA	22.2786	149	85.2349	Hormone/hormone inhibitor
124	blue light for 4hours	21.8384	148	23.6486	Light
152	flower (stage 15)	21.4019	147	90.4762	Tissue/stage
32	hyponastic growth induction (petriole + ethylene)	21.4019	147	79.5918	Hormone/hormone inhibitor
81	etr1	21.4019	147	67.3469	Mutant/overexpressor/transgene
351	CBF2 overexpressor	21.4019	147	63.2653	Mutant/overexpressor/transgene
53/328	high/low Ca2+	21.4019	147	17.6871	Compound
150	caulin leaves (day 21)	20.5401	145	86.8966	Tissue/stage
77	PCD (fumonisin treatment)	20.5401	145	68.2759	Stress
133	Altered lipid saturation (fad3/fad7/fad8 triple mutant)	19.6933	143	9.09091	Mutant/overexpressor/transgene
337	E2Fa:Dpa overexpression	19.2756	142	84.507	Mutant/overexpressor/transgene
353	Zat12 overexpressor (NASCArray 353)	19.2756	142	58.4507	Mutant/overexpressor/transgene
181	t-zeatin:ARR22oxmutant (interaction)	18.8618	141	31.9149	Hormone/hormone inhibitor
140	Salt stress	18.4517	140	94.2857	Stress
177	ga1 (NASCArray181)	18.0455	139	34.5324	Mutant/overexpressor/transgene
53/328	echotype:high/low Ca2+	17.2448	137	21.1679	Compound
180	ga1 (NASCArray177)	16.8503	136	93.3824	Mutant/overexpressor/transgene
142	Genotoxic stress	16.4597	135	92.5926	Stress
356	FRI:flc3 (interaction)	15.3118	132	25	Mutant/overexpressor/transgene
186	2,4,6-trihydroxybenzamide	14.9372	131	64.8855	Hormone/hormone inhibitor
152	ag-12	14.2001	129	39.5349	Mutant/overexpressor/transgene
151	roots (day 17)	13.8377	128	95.3125	Tissue/stage
155	lfy12:long day (interaction)	13.8377	128	56.25	Condition
355	cpr5:npr1 (interaction)	13.8377	128	39.0625	Mutant/overexpressor/transgene
108	Circadian clock	13.8377	128	18.75	Condition
179	6-deoxocastasterone	13.4794	127	57.4803	Hormone/hormone inhibitor
155	ft.CS184:long day (interaction)	13.4794	127	38.5827	Condition
152	sepals (stage 12)	13.1252	126	69.0476	Tissue/stage
70	sfr6 drought	13.1252	126	52.381	Stress
150	vegetative rosette (short days; day 14)	12.7752	125	9.6	Tissue/stage
178	brassinolide (NASCArray 178)	12.4293	124	50	Hormone/hormone inhibitor
124	UVA/B light for 5 min (sampled 45 min after)	12.0877	123	81.3008	Light
185	uniconazole	11.7503	122	82.7869	Hormone/hormone inhibitor
179	brassinolide (NASCArray 179)	11.7503	122	56.5574	Hormone/hormone inhibitor
174	methyl jasmonate	11.4171	121	72.7273	Hormone/hormone inhibitor
155	lfy12 (NASCArray 155)	11.4171	121	62.8099	Mutant/overexpressor/transgene
124	UVA/B light for 5 min (sampled 4 hours after)	11.4171	121	40.4959	Light
356	flc3	11.0882	120	64.1667	Mutant/overexpressor/transgene
185	propiconazole	10.7636	119	56.3025	Hormone/hormone inhibitor
150	petiol (leaf nr 7; day 17)	10.7636	119	13.4454	Tissue/stage
151	roots (day 7)	10.4434	118	98.3051	Tissue/stage
32	hyponastic growth induction (petriole, 10% of normal light )	10.4434	118	49.1525	Light
179	typhasterol	10.4434	118	47.4576	Hormone/hormone inhibitor
70	sfr3	10.1274	117	81.1966	Mutant/overexpressor/transgene
141	Drought stress	9.81591	116	87.069	Stress
179	3-dehydroteasterone	9.81591	116	53.4483	Hormone/hormone inhibitor
150	rosette leaf (nr 2 day 17)	9.50878	115	79.1304	Tissue/stage
175	IAA	9.50878	115	76.5217	Hormone/hormone inhibitor
171	sulfate	9.50878	115	31.3043	Compound
335	MBF1c overexpressor	9.20608	114	75.4386	Mutant/overexpressor/transgene
180	det2 (NASCArray178)	9.20608	114	67.5439	Mutant/overexpressor/transgene
178	brassinolide treatment of det2	9.20608	114	65.7895	Hormone/hormone inhibitor
155	co.CS175:long day (interaction)	8.90784	113	50.4425	Condition
70	sfr6 cold	8.61408	112	70.5357	Stress
177	GA3	8.61408	112	54.4643	Hormone/hormone inhibitor
179	castasterone	8.61408	112	47.3214	Hormone/hormone inhibitor
357	ft-2	8.04014	110	60.9091	Mutant/overexpressor/transgene
155	ft.CS184	8.04014	110	60	Mutant/overexpressor/transgene
187	brassinazole91	7.48447	108	68.5185	Hormone/hormone inhibitor
152	clv3.7	7.48447	108	63.8889	Mutant/overexpressor/transgene
138	Cold stress	7.21356	107	76.6355	Stress
176	ABA (seedlings)	6.94731	106	76.4151	Hormone/hormone inhibitor
187	brassinazole220	6.42889	104	49.0385	Hormone/hormone inhibitor
349	Cold:Media (soil or plate, 4C)	6.17678	103	61.165	Stress
186	PCIB	6.17678	103	58.2524	Hormone/hormone inhibitor
146	Heat stress, recovery from	6.17678	103	53.3981	Stress
179	teasterone	5.92944	102	60.7843	Hormone/hormone inhibitor
357	lfy	5.92944	102	52.9412	Mutant/overexpressor/transgene
155	co.CS175	5.68691	101	48.5149	Mutant/overexpressor/transgene
70	sfr2.Cold	5.44921	100	70	Stress
183	ABA (during seed imbibition)	5.44921	100	69	Hormone/hormone inhibitor
367	root: EZ3	5.44921	100	14	Tissue/stage
192	ibuprofen	5.21638	99	71.7172	Hormone/hormone inhibitor
338	Zat12 overespressor:H2O2 (interaction)	5.21638	99	64.6465	Mutant/overexpressor/transgene
153	hypocotyl	4.98845	98	76.5306	Tissue/stage
152	ap3.6	4.98845	98	70.4082	Mutant/overexpressor/transgene
356	FRI	4.98845	98	54.0816	Mutant/overexpressor/transgene
179	6-deoxotyphasterol	4.98845	98	50	Hormone/hormone inhibitor
179	3-dehydro-6-deoxoteasterone	4.76544	97	53.6082	Hormone/hormone inhibitor
354	K starvation, roots	4.54739	96	48.9583	Stress
185	paclobutrazol	4.33432	95	71.5789	Hormone/hormone inhibitor
367	root: epidermal atrichoblasts	4.33432	95	60	Tissue/stage
172	ACC	4.33432	95	55.7895	Hormone/hormone inhibitor
367	root: YDZ3	4.33432	95	43.1579	Tissue/stage
367	root: endodermis cortex	4.12628	94	41.4894	Tissue/stage
124	UVA light for 5 min (sampled 45 min after)	3.72536	92	71.7391	Light
132	Calmoduline overexpressor	3.72536	92	65.2174	Mutant/overexpressor/transgene
133	Cold treatment	3.72536	92	63.0435	Stress
24	sfr6-1	3.72536	92	29.3478	Mutant/overexpressor/transgene
367	root: lateral root cap	3.53256	91	69.2308	Tissue/stage
190	MG13	3.53256	91	51.6484	Compound
124	blue light for 45min	3.53256	91	48.3516	Light
367	root: stele	3.53256	91	37.3626	Tissue/stage
334	fri:flc Circadian rythm	3.34489	90	86.6667	Condition
177	GA3 treatment: ga1 (interaction)	3.34489	90	63.3333	Hormone/hormone inhibitor
330	M. persicae	2.98508	88	65.9091	Pathogen/elicitor
70	sfr6	2.98508	88	57.9545	Mutant/overexpressor/transgene
330	P. rapae	2.813	87	85.0575	Pathogen/elicitor
324	Caesium137	2.813	87	78.1609	Compound
124	white light for 45min	2.813	87	47.1264	Light
361	Tracheary element transdifferentiation (suspension cells; brassinolide & H3BO3)	2.64617	86	76.7442	Tissue/stage
152	petals (stage 15)	2.64617	86	70.9302	Tissue/stage
184	gibberellin	2.64617	86	46.5116	Hormone/hormone inhibitor
70	sfr3.Cold	2.17744	83	63.8554	Stress
367	root: endodermis	1.89163	81	67.9012	Tissue/stage
152	ap2.6	1.89163	81	64.1975	Mutant/overexpressor/transgene
146	Heat stress	1.89163	81	49.3827	Stress
150	vegetative rosette (short days; day 21)	1.89163	81	17.284	Tissue/stage
124	red light for 1 min (sampled 45 min after)	1.62734	79	60.7595	Light
173	zeatin	1.62734	79	35.443	Hormone/hormone inhibitor
367	root: MZ3	1.62734	79	34.1772	Tissue/stage
179	6-deoxoteasterone	1.5033	78	62.8205	Hormone/hormone inhibitor
185	prohexadione	1.5033	78	52.5641	Hormone/hormone inhibitor
70	sfr2	1.5033	78	48.7179	Mutant/overexpressor/transgene
179	cathasterone	1.38467	77	58.4416	Hormone/hormone inhibitor
149	seedling, green part (day 7)	1.38467	77	0	Tissue/stage
124	red light for 45min	1.16364	75	52	Light
24	sfr2-1	0.786275	71	71.831	Mutant/overexpressor/transgene
81	GA4	0.786275	71	71.831	Hormone/hormone inhibitor
153	stem 2nd internode	0.705271	70	62.8571	Tissue/stage
188	AVG	0.62952	69	39.1304	Hormone/hormone inhibitor
124	far-red light for 45min	0.558962	68	45.5882	Light
153	shoot apex, vegetative leaves	0.377659	65	16.9231	Tissue/stage
179	6-deoxocathasterone	0.327009	64	56.25	Hormone/hormone inhibitor
152	carpels (stage 15)	0.281041	63	58.7302	Tissue/stage
186	NPA (inhibitor of auxin transport)	0.239601	62	62.9032	Hormone/hormone inhibitor
153	stem 1st node	0.169592	60	41.6667	Tissue/stage
152	petals (stage 12)	0.115357	58	41.3793	Tissue/stage
154	siliques (stage 5)	0.0935628	57	59.6491	Tissue/stage
133	Cold +alt. lipid saturation (fad3/fad7/fad8 triple mutant)	0.0935628	57	57.8947	Stress
154	seeds (stage 9)	0.0592968	55	87.2727	Tissue/stage
154	siliques (stage 4)	0.0355639	53	64.1509	Tissue/stage
81	GA4 treatment of etr1 mutant	0.0355639	53	60.3774	Hormone/hormone inhibitor
170	seeds at 4C vs. 22C (vernalization)	0.0200508	51	31.3725	Tissue/stage
154	seeds (stage 8)	0.0146796	50	86	Tissue/stage
152	stamen (stage 15)	0.0146796	50	72	Tissue/stage
179	campestanol	0.0146796	50	70	Hormone/hormone inhibitor
152	flower (stage 10/11)	0.0146796	50	36	Tissue/stage
154	seeds (stage 6)	0.00744968	48	66.6667	Tissue/stage
152	carpels (stage 12)	0.00744968	48	64.5833	Tissue/stage
154	seeds (stage 10)	0.00515578	47	82.9787	Tissue/stage
152	flower (stage 12)	0.00515578	47	31.9149	Tissue/stage
192	B9 (daminozide)	0.00349655	46	47.8261	Hormone/hormone inhibitor
154	siliques (stage 3)	0.00232195	45	31.1111	Tissue/stage
154	seeds (stage 7)	0.00059515	42	69.0476	Tissue/stage
152	flower (stage 9)	0.000123107	39	48.7179	Tissue/stage
155	apical region rosett stage	5.55824e-07	31	80.6452	Tissue/stage
152	stamen (stage 12)	8.8574e-10	24	79.1667	Tissue/stage
153	shoot apex vegetative	9.11634e-12	20	35	Tissue/stage
152	pollen	1.75199e-13	17	70.5882	Tissue/stage
153	shoot apex tranition (before bolting)	9.42635e-15	15	40	Tissue/stage
153	shoot apex, inflorescence (after bolting)	3.8946e-16	13	76.9231	Tissue/stage
